# Supplementary material for: Highly sensitive detection of platelet-derived growth factor on a functionalized diamond surface using aptamer sandwich design
Source: Royal Society of Chemistry journal article supplement (doi:10.1039/c2an15933c), 2012-01-01
Supplement: c2an15933c.pdf [file c2an15933c.pdf]

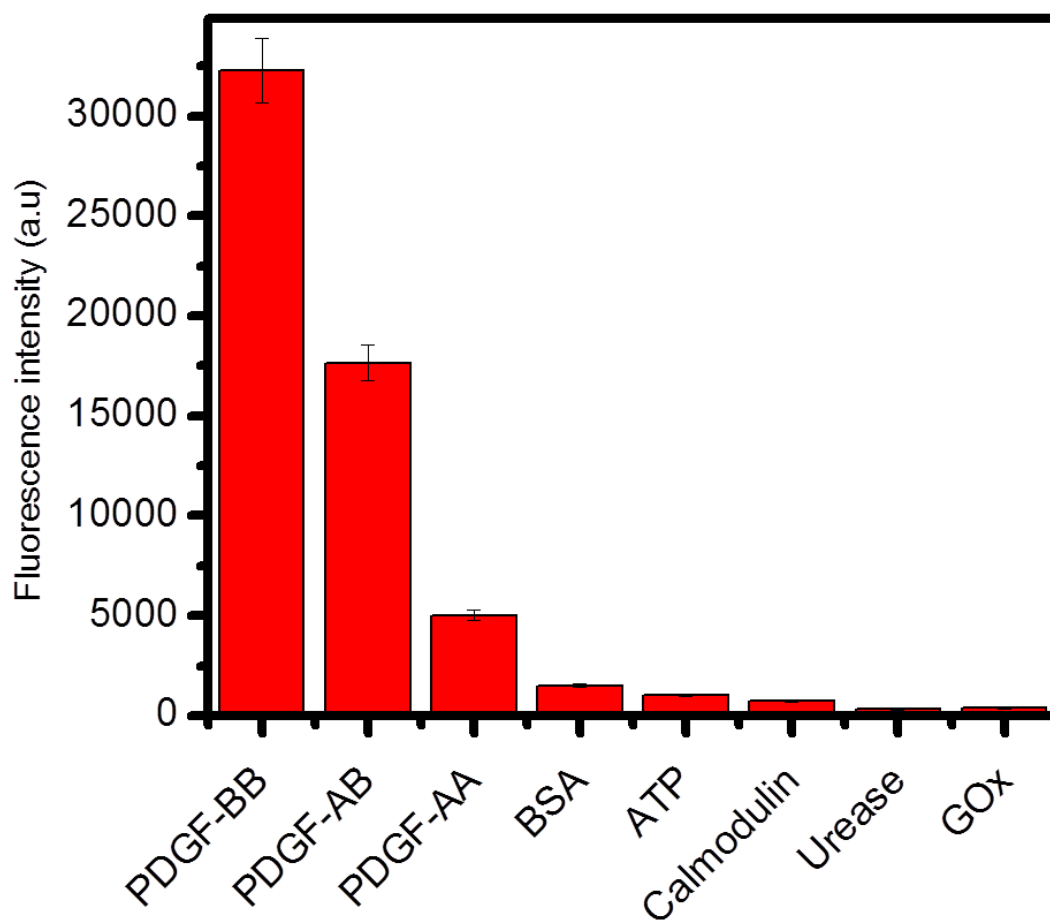

S1. Fluorescence signal intensity detected by various kinds of biomolecules. The concentrations of all the biomolecules were  $1\mu\text{M}$  and conducted in PBS with  $5.5\text{ mM MgCl}_2$  buffer solution.
